# Supplementary material
Source: PubMed Central journal article supplement (PMC11028778)
Supplement: 262_2016_1923_MOESM1_ESM.pdf [file 262_2016_1923_MOESM1_ESM.pdf]

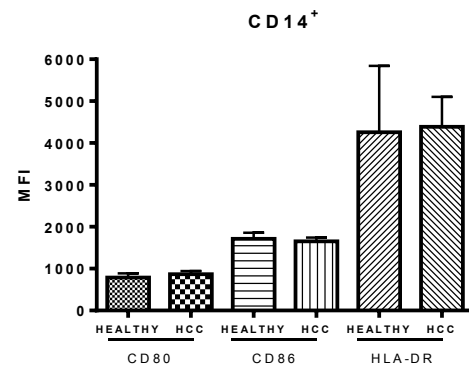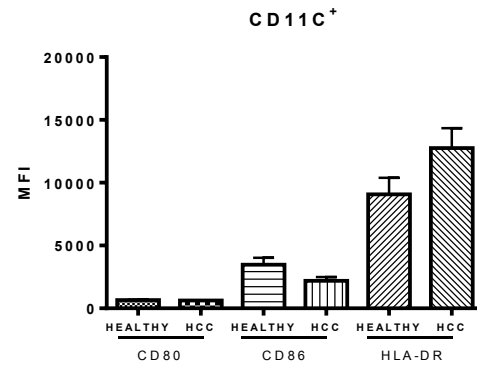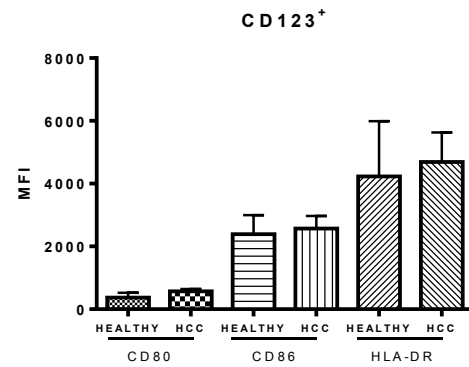

**Suppl Fig.1** Baseline expression of the APC markers. Evaluation on PBMCs from HCC and healthy subjects after 24 h treatment with RNAdjuvant by flow cytometry.

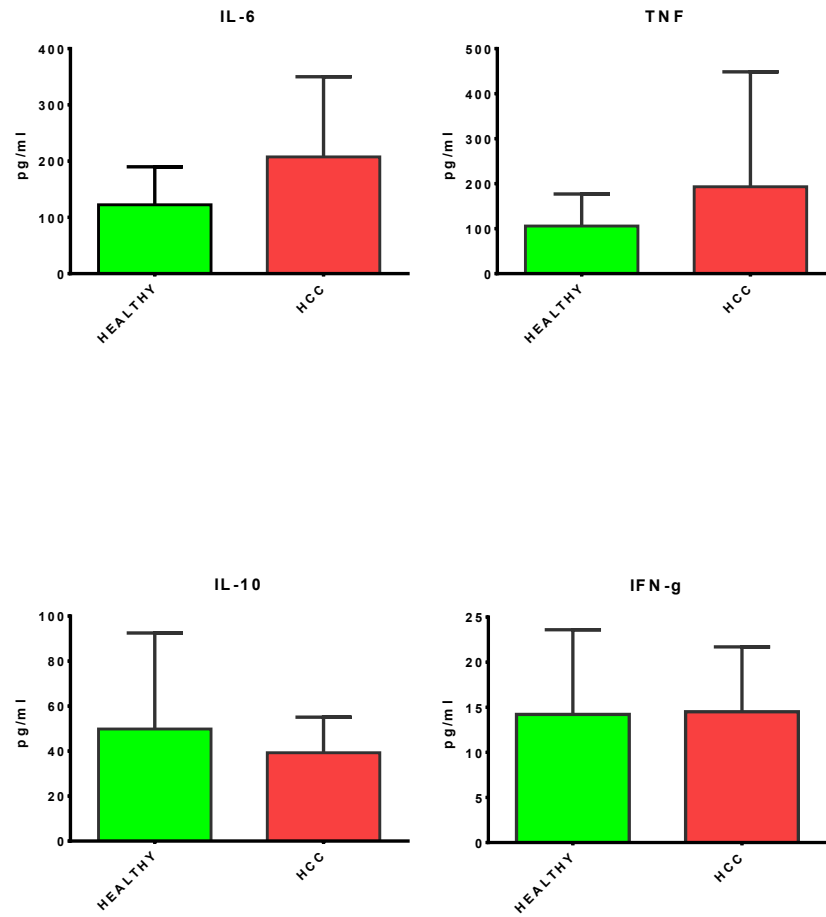

**Suppl Fig.2** Baseline production of all four cytokines. Evaluation on PBMCs from healthy subjects and HCC patients by ELISA.

**Suppl. Table 1** List of differentially expressed genes and their related-pathway in healthy and HCC individuals.

| PATHWAY                      | GENE   | HEALTHY | HCC  | SHARED |
|------------------------------|--------|---------|------|--------|
| Th1 pathway                  | CXCL10 | UP      | UP   | Y      |
|                              | IFNG   | UP      | UP   | Y      |
|                              | JAK2   | UP      | UP   | Y      |
|                              | STAT1  | UP      | -    | N      |
|                              | STAT3  | UP      | UP   | Y      |
|                              | IFNGR1 | DOWN    | DOWN | Y      |
|                              | TYK2   | -       | DOWN | N      |
|                              | TBX21  | -       | UP   | N      |
| Th2 pathway                  | IL10   | UP      | UP   | Y      |
|                              | IL13   | -       | UP   | N      |
| TLR 3,8 signaling            | IFNB1  | UP      | UP   | Y      |
|                              | IFNA1  | UP      | UP   | Y      |
|                              | MX1    | UP      | UP   | Y      |
|                              | TICAM1 | UP      | UP   | Y      |
|                              | MYD88  | UP      | UP   | Y      |
|                              | TLR3   | -       | UP   | N      |
|                              | TLR8   | -       | UP   | N      |
|                              | NFKB1  | -       | UP   | N      |
|                              | NFKB1A | UP      | UP   | Y      |
| Pro-inflammatory cytokine    | IL-6   | UP      | UP   | Y      |
|                              | TNF    | UP      | UP   | Y      |
| NOD1 signaling               | NOD1   | UP      | UP   | Y      |
| RIG-I signaling              | IRF7   | UP      | UP   | Y      |
|                              | DDX58  | UP      | UP   | Y      |
| TLR 4,5,6 signaling          | TLR4   | DOWN    | -    | N      |
|                              | TLR5   | -       | DOWN | N      |
|                              | TLR6   | -       | DOWN | N      |
|                              | MAPK1  | DOWN    | DOWN | Y      |
|                              | LY96   | DOWN    | DOWN | Y      |
|                              | CD14   | DOWN    | DOWN | Y      |
|                              | IRAK1  | -       | DOWN | N      |
| Antigen presentation pathway | CD40   | UP      | UP   | Y      |
|                              | CD80   | UP      | UP   | Y      |
|                              | CD86   | -       | DOWN | N      |
|                              | HLA-A  | UP      | UP   | Y      |
|                              | HLA-A  | UP      | UP   | Y      |
| Apoptosis                    | FASLG  | UP      | UP   | Y      |
| Inflammasome signaling       | CASP1  | UP      | UP   | Y      |
|                              | IL1B   | UP      | UP   | Y      |

UP= up-regulation; DOWN= down-regulation; Y= yes; N=no
